# Supplementary material for: Outcomes and complications of single-longitudinal incision technique for totally implantable venous access ports in the upper arm
Source: Research Square preprint supplement (doi:10.21203/rs.3.rs-4594984/v1), 2024-07-18
Supplement: Supplementary file 1 [file f136b98eabcc7849af53dff6.xlsx]

## Sheet: Table 1. Patient demographic ch
Table 1. Patient demographic characteristics and underlying malignancies.
	n	%
Patients	123
Male	64	52.0
Female	59	47.9
Age (y) (mean, standard deviation)	58.86±12.88
Height (cm)	165.16±10.81
Weight (kg)	59.51±8.36
BMI	22.04±4.01
Access sites
basilic vein	96	78.0
brachial vein	27	22.0
Fluoroscopy time(s)	12.3±13.4
Procedure time(min)	15.4±2.9
Removal	43	35.0
In use	44	35.8
Malignancy
haematological tumor	36	29.3
gastrointestinal tumor	38	30.9
bone tumour	7	5.7
breast cancer	11	8.9
pancreatic cancer	8	6.5
lung cancer	11	8.9
head and neck tumor	6	4.9
gynecological tumor	5	4.1
intrahepatic cholangiocarcinoma	1	0.8
Body mass index (BMI)

## Sheet: Table 2. Incidence of  complica
Table 2. Incidence of complications
Complications	n	%
Ecchymosis	9	7.3
Infection	5	4.1
Catheter occlusion	2	1.6
Thrombosis	1	0.8
Total	17	13.8

## Sheet: Table 3 Multiple logistic regre
Table 3 Multiple logistic regression analysis for subcutaneous ecchymosis
	B	SE	Wald X2	p	OR	OR 95%CI
						Lower	Upper
Age (years)	-0.001	0.034	0.001	0.982	0.999	0.934	1.069
Height (cm)	0.06	0.265	0.051	0.822	1.062	0.631	1.785
Weight (kg)	-0.065	0.379	0.03	0.863	0.937	0.446	1.969
BMI (kg/m2)	0.244	0.99	0.061	0.806	1.276	0.183	8.88
Blood platelet	0.004	0.004	1.101	0.294	1.004	0.997	1.011
INR	-5.032	3.766	1.785	0.182	0.007	0	10.484
Operation time (min)	-0.055	0.178	0.095	0.757	0.946	0.668	1.342
Pressing >30 min	3.186	1.147	7.721	0.005	24.184	2.556	228.79
Intercept	-9.144	43.673	0.044	0.834
Body mass index (BMI)
